# Supplementary material
Source: PubMed Central journal article supplement (PMC5035617)
Supplement: NIHMS808662-supplement-4.pdf [file NIHMS808662-supplement-4.pdf]

**Table 3 (online) Univariate analysis for association of demographic factors with incidence of treatment-requiring ROP**

| <b>Demographic factors</b>              | <b># of infants</b> | <b>Treatment-requiring ROP (%)</b> | <b>OR (95% CI)</b> | <b>P-value</b> |
|-----------------------------------------|---------------------|------------------------------------|--------------------|----------------|
| <b>Birth weight (grams)</b>             |                     |                                    |                    | <0.0001        |
| ≤500                                    | 29                  | 13 (44.8%)                         | 42.0 (12.3 – 144)  |                |
| 501 - 750                               | 243                 | 50 (20.6%)                         | 13.4 (4.75 – 37.8) |                |
| 751 - 900                               | 176                 | 11 (6.3%)                          | 3.45 (1.08 – 11.0) |                |
| 901 - 1000                              | 112                 | 7 (6.3%)                           | 3.45 (0.99 – 12.1) |                |
| 1001 - 1250                             | 211                 | 4 (1.9%)                           | 1.00               |                |
| as continuous (every 100g decrease)     |                     |                                    | 1.72 (1.49 – 1.98) | <0.0001        |
|                                         |                     |                                    |                    |                |
| <b>Gestational age (weeks)</b>          |                     |                                    |                    | <0.0001        |
| ≤25                                     | 280                 | 65 (23.2%)                         | 16.2 (5.79 – 45.2) |                |
| 26                                      | 137                 | 9 (6.6%)                           | 3.76 (1.14 – 12.5) |                |
| 27                                      | 136                 | 7 (5.2%)                           | 2.90 (0.83 – 10.1) |                |
| ≥28                                     | 137                 | 4 (1.8%)                           | 1.00               |                |
| as continuous (for every week decrease) |                     |                                    | 1.98 (1.67 – 2.34) | <0.0001        |
|                                         |                     |                                    |                    |                |
| <b>Gender</b>                           |                     |                                    |                    |                |
| Female                                  | 369                 | 35 (9.5%)                          | 1.00               |                |
| Male                                    | 387                 | 50 (12.4%)                         | 1.36 (0.86 – 2.14) | 0.19           |
|                                         |                     |                                    |                    |                |
| <b>Ethnicity of infant</b>              |                     |                                    |                    |                |
| Not Hispanic or Latino                  | 647                 | 66 (10.2%)                         | 1.00               | 0.03           |
| Hispanic or Latino                      | 89                  | 17 (19.1%)                         | 2.08 (1.16 – 3.74) |                |
| Unable to answer                        | 35                  | 2 ( 5.7%)                          | 0.53 (0.13 – 2.27) |                |
|                                         |                     |                                    |                    |                |
| <b>Race of infant</b>                   |                     |                                    |                    | 0.44           |
| Black only                              | 237                 | 21 ( 8.9%)                         | 1.00               |                |
| White only                              | 430                 | 51 (11.9%)                         | 1.38 (0.81 – 2.36) |                |
| Others                                  | 104                 | 13 (12.5%)                         | 1.47 (0.71 – 3.06) |                |
|                                         |                     |                                    |                    |                |
| <b>Multiple births</b>                  |                     |                                    |                    | 0.84           |
| No                                      | 537                 | 60 (11.2%)                         | 1.00               |                |
| Yes                                     | 234                 | 25 (10.7%)                         | 0.95 (0.58 – 1.56) |                |
