# Supplementary material
Source: PubMed Central journal article supplement (PMC5035617)
Supplement: NIHMS808662-supplement-6.pdf [file NIHMS808662-supplement-6.pdf]

**Table 7 (online) Prediction of treatment-requiring ROP using predictors**

| <b>Predictors</b>                                                   | <b>Area under ROC curve (95% CI)</b> | <b>P-value for comparing to image findings</b> |
|---------------------------------------------------------------------|--------------------------------------|------------------------------------------------|
| Image findings <sup>§</sup>                                         | 0.82 (0.77 – 0.87)                   | --                                             |
| GA                                                                  | 0.75 (0.70 – 0.79)                   | 0.03                                           |
| Respiratory status                                                  | 0.70 (0.64 – 0.76)                   | 0.002                                          |
| Weight gain                                                         | 0.60 (0.54 – 0.66)                   | <0.0001                                        |
|                                                                     |                                      |                                                |
| GA + Image findings <sup>§</sup>                                    | 0.86 (0.81 – 0.90)                   | 0.052                                          |
| GA + image findings <sup>§</sup> + respiratory status               | 0.87 (0.83 – 0.91)                   | 0.01                                           |
| GA + image findings <sup>§</sup> + weight gain                      | 0.87 (0.83 – 0.91)                   | 0.008                                          |
| GA + image findings <sup>§</sup> + respiratory status + weight gain | 0.88 (0.84 – 0.91)                   | 0.004                                          |

<sup>§</sup>Image findings include: quadrants of pre-plus or plus in posterior pole, ROP stage and zone, blot hemorrhage.
