# Supplementary material
Source: PubMed Central journal article supplement (PMC5035617)

**Figure 3 (online): The ROC curve for predicting treatment-requiring ROP using risk score**

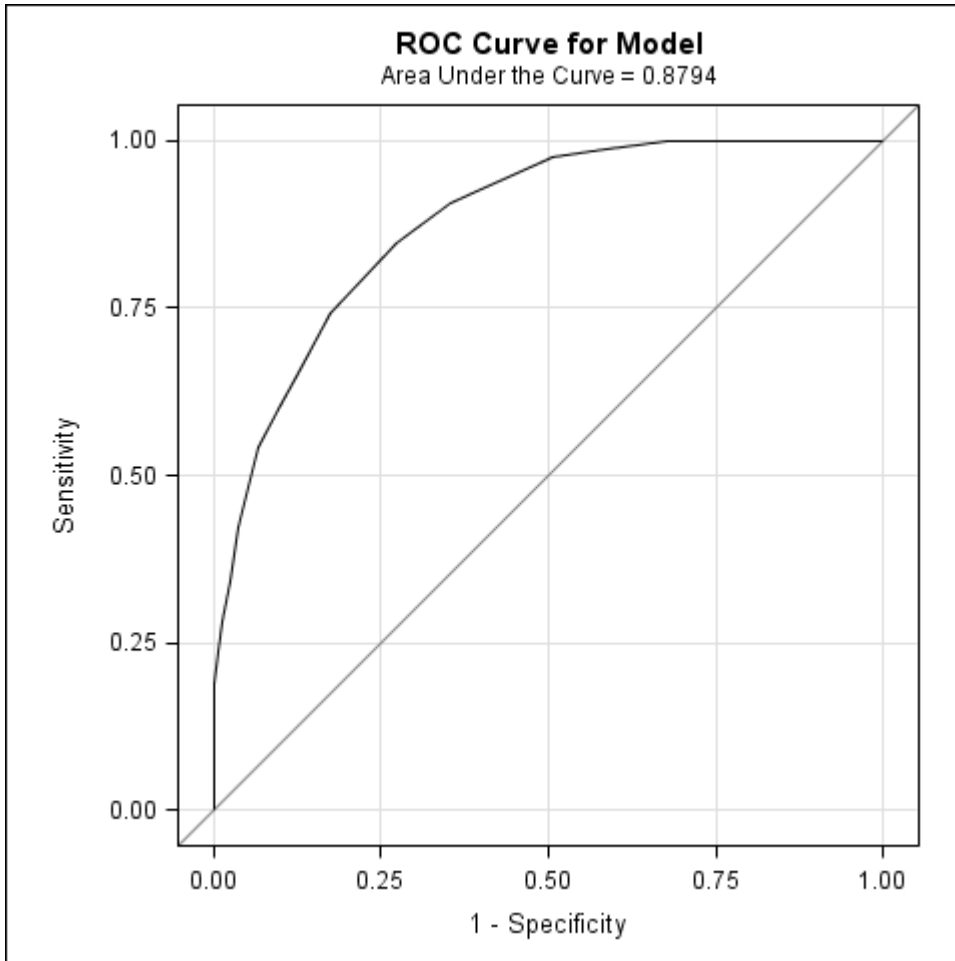

Supplement: NIHMS808662-supplement-1.pdf [file NIHMS808662-supplement-1.pdf]
